# Supplementary material for: Telemedicine for medical abortion: a systematic review
Source: PubMed Central journal article supplement — BJOG. 2019 Apr 25;126(9):1094–102. doi: 10.1111/1471-0528.15684 (PMC7496179; doi:10.1111/1471-0528.15684), 2019-04-25
Supplement: BJO-126-1094-s001.pdf [file BJO-126-1094-s001.pdf]

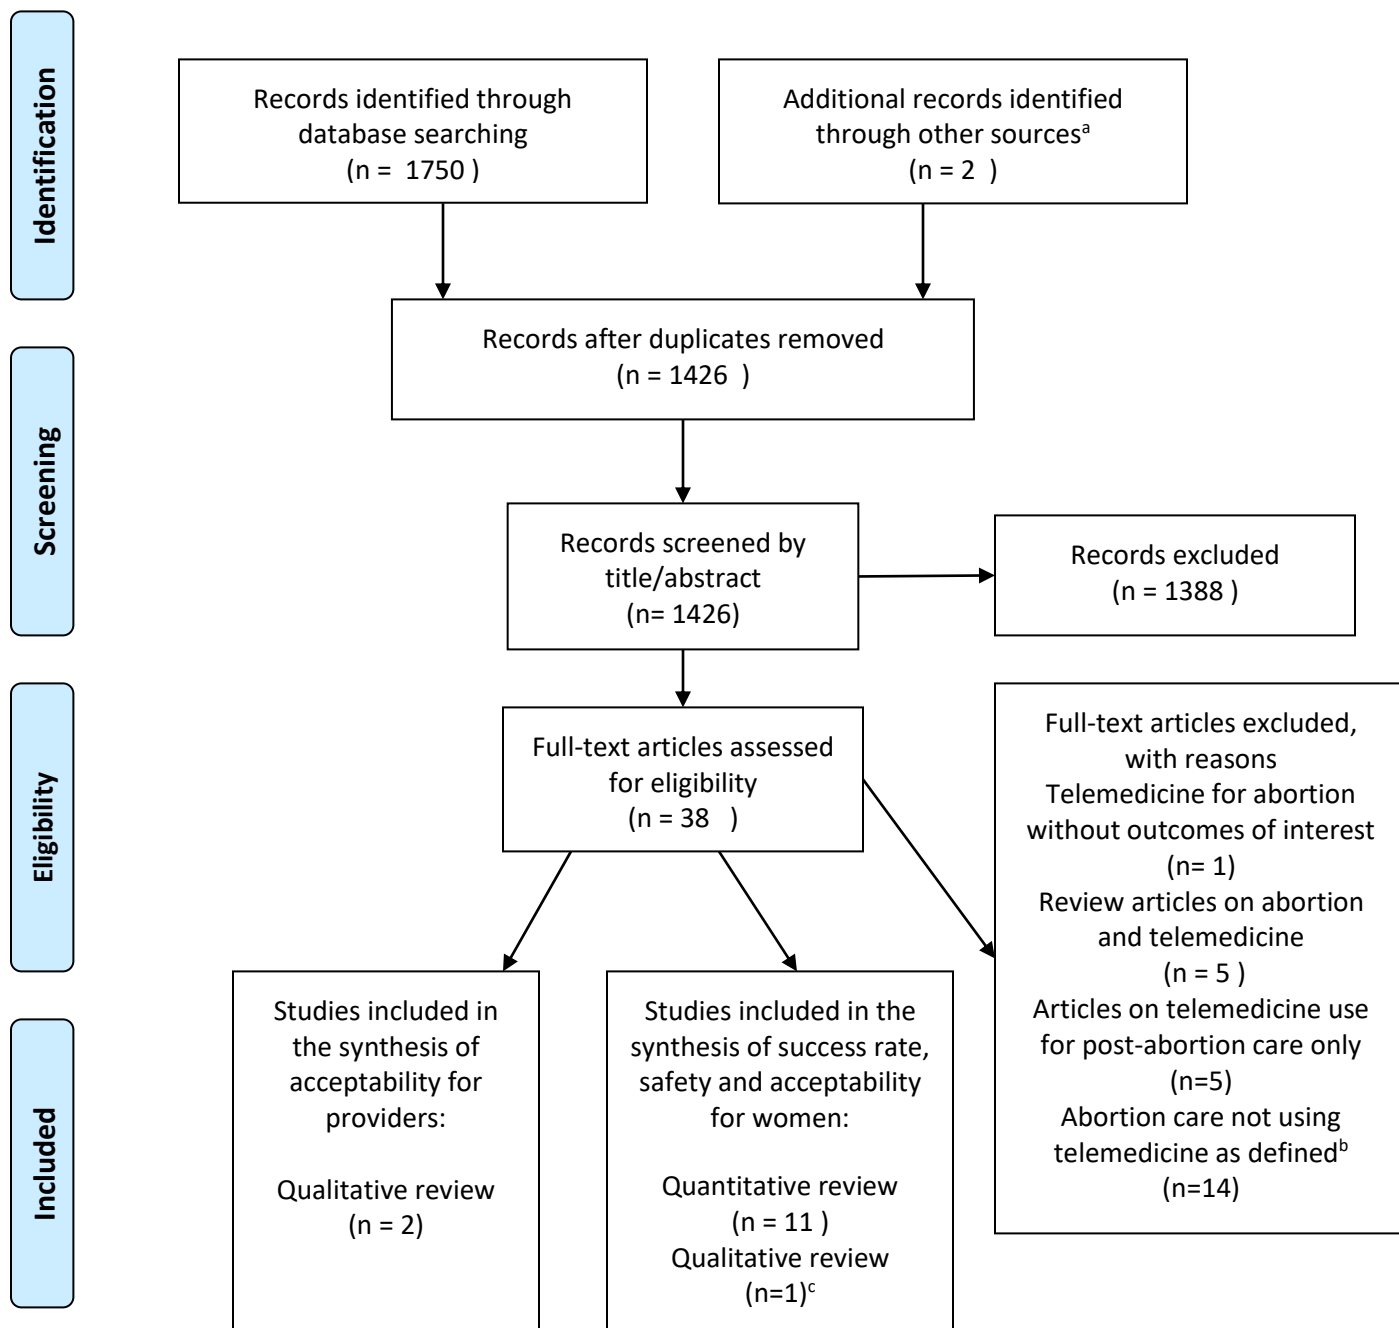

**Figure S1.** PRISMA flow diagram of study inclusion process

a Personal communication with authors, articles at that time not yet available through database search.

b The provision of pre-abortion counselling, instructions for the home-abortion and instructions concerning abortion follow-up through on-line written exchange, telephone conversations or skype conference calls.

c One study represented in the synthesis of acceptability for both women and providers

From: Moher D, Liberati A, Tetzlaff J, Altman DG, The PRISMA Group (2009). Preferred Reporting Items for Systematic Reviews and Meta-Analyses: The PRISMA Statement. PLoS Med 6(7): e1000097. doi:10.1371/journal.pmed1000097

For more information, visit [www.prisma-statement.org](http://www.prisma-statement.org).
