# Supplementary material for: Telemedicine for medical abortion: a systematic review
Source: PubMed Central journal article supplement — BJOG. 2019 Apr 25;126(9):1094–102. doi: 10.1111/1471-0528.15684 (PMC7496179; doi:10.1111/1471-0528.15684), 2019-04-25
Supplement: BJO-126-1094-s002.pdf [file BJO-126-1094-s002.pdf]

**Table S1.** Study design, setting, sample size and outcomes for studies included in the systematic review of medical abortion through telemedicine

| Study               | Design                         | Source of data<br>(weeks gestation) | Setting                      | Study time period | Sample size (n) | LTFU n (%) | LTFU analysis | Power analysis | Outcomes relevant to review                                                                                                       |                                                           |
|---------------------|--------------------------------|-------------------------------------|------------------------------|-------------------|-----------------|------------|---------------|----------------|-----------------------------------------------------------------------------------------------------------------------------------|-----------------------------------------------------------|
|                     |                                |                                     |                              |                   |                 |            |               |                | Primary Outcomes                                                                                                                  | Secondary Outcomes                                        |
| Gomperts et al 2008 | Descriptive study              | Women on Web (≤10GW)                | 33 countries                 | 2006              | 484             | 219 (45%)  | no            | no             | 1. Rate continuing pregnancy<br>2. Rate surgical intervention<br>3. Emotional experience for women                                | Antibiotics                                               |
|                     | Descriptive study <sup>a</sup> | Women on Web (≤10GW)                | not specified                | 2007              | 174             | 56 (23%)   | NA            | no             | 1. Rate continuing pregnancy<br>2. Rate surgical intervention                                                                     | Antibiotics                                               |
| Gomperts et al 2012 | Retrospective cohort study     | Women on Web (≤10GW)                | 5 continents                 | 2007-2008         | 4325            | 1730 (40%) | no            | no             | 1. Rate blood transfusion<br>2. Rate surgical intervention<br>3. Emotional experience for women                                   | Clinical visit for complications                          |
| Gomperts et al 2014 | Retrospective cohort study     | Women on Web (<7GW->12GW)           | Brazil                       | 2011-2011         | 602             | 229 (38%)  | no            | no             | 1. Rate continuing pregnancy<br>2. Rate surgical intervention<br>3. Emotional experience for women                                | Heavy bleeding                                            |
| Larrea et al 2015   | Descriptive study              | Women on Web (<7GW->12GW)           | Latin America                | 2010-2011         | 2043            | 1161 (57%) | yes           | no             | 1. Rate continuing pregnancy<br>2. Rate surgical intervention<br>3. Rate incomplete abortion<br>4. Emotional experience for women | Complications, Antibiotics, "Bleeding more than expected" |
| Aiken et al 2016    | Descriptive study              | Women on Web (≤10GW)                | Ireland and Northern Ireland | 2010-2012         | 1642            | 461 (28%)  | yes           | no             | Emotional experience for women                                                                                                    |                                                           |
| Aiken et al 2017    | Descriptive study              | Women on Web (≤10GW)                | Ireland and Northern Ireland | 2010-2012         | 1636            | 455 (28%)  | yes           | no             | 1. Rate blood transfusion<br>2. Rate continuing pregnancy<br>3. Rate surgical intervention<br>4. Rate incomplete abortion         | Heavy bleeding, Antibiotics, Fever                        |
| Les et al 2017      | Descriptive study              | Women on Web (<7GW->12GW)           | Hungary                      | 2013-2017         | 118             | 45 (38%)   | no            | no             | 1. Rate surgical intervention<br>2. Emotional experience for women                                                                | Heavy bleeding                                            |
| Grossman et al 2011 | Prospective cohort study       | Planned Parenthood (≤9GW)           | Iowa, USA                    | 2008-2009         | 578             | 129 (28%)  | no            | NA             | 1. Rate blood transfusion<br>2. Rate continuing pregnancy<br>3. Rate surgical intervention<br>4. Emotional experience             |                                                           |

for women

|                     |                             |                               |                   |           |                     |             |    |     |                                                                                                                                                       |                                  |
|---------------------|-----------------------------|-------------------------------|-------------------|-----------|---------------------|-------------|----|-----|-------------------------------------------------------------------------------------------------------------------------------------------------------|----------------------------------|
|                     | Descriptive study           | Planned Parenthood (≤9GW)     | Iowa, USA         | 2007-2008 | 3556                | 0           | NA | yes | 1. Rate blood transfusion<br>2. Rate continuing pregnancy                                                                                             |                                  |
| Grindlay et al 2013 | Qualitative study           | Planned Parenthood (≤9GW)     | Iowa, USA         | 2009-2010 | 40 <sup>b</sup>     | 0           | NA | no  | 1. Emotional experience for women<br>2. Emotional experience for providers                                                                            |                                  |
| Grindlay et al 2016 | Qualitative study           | Planned Parenthood (≤9GW)     | Alaska, USA       | 2013-2013 | 8                   | 0           | NA | no  | Emotional experience for providers                                                                                                                    |                                  |
| Grossman et al 2017 | Retro-spective cohort study | Planned Parenthood (≤9GW)     | Iowa, USA         | 2008-2015 | 19 170 <sup>c</sup> | 0           | NA | yes | Rate blood transfusion                                                                                                                                | Clinical visit for complications |
| Wiebe et al 2014    | Descriptive Study           | Willow Women's Clinic (≤10GW) | Vancouver, Canada | 2012-2014 | 19                  | 1 (5.3%)    | no | no  | Rate surgical intervention                                                                                                                            |                                  |
| Hyland et al 2018   | Descriptive study           | The Tabbot Foundation (≤10GW) | Australia         | 2015-2016 | 1010                | 242 (24.3%) | no | no  | 1. Rate blood transfusion<br>2. Rate continuing pregnancy<br>3. Rate surgical intervention<br>4. Rate complete abortion<br>5. Rate hospital admission |                                  |

n=number, GW= weeks gestation, LTFU = lost to follow up (did not confirm intake/non-intake or provide follow-up information)

a estimated gestational age at abortion treatment

b 20 telemedicine abortion patients, 5 in-person patients, 15 providers

c 10 405 telemedicine abortion patients, 8765 in-person abortion patients
