# Supplementary material for: Telemedicine for medical abortion: a systematic review
Source: PubMed Central journal article supplement — BJOG. 2019 Apr 25;126(9):1094–102. doi: 10.1111/1471-0528.15684 (PMC7496179; doi:10.1111/1471-0528.15684), 2019-04-25
Supplement: BJO-126-1094-s003.pdf [file BJO-126-1094-s003.pdf]

**Table S2.** Description of telemedicine interventions used in the studies selected for the systematic review of medical abortion through telemedicine

| Clinic                | Studies Included                                                                                                                                 | Description of telemedicine intervention                                                                                                                                                                  |                                                                                                                                                                                              |                                                                                                                                                                     |
|-----------------------|--------------------------------------------------------------------------------------------------------------------------------------------------|-----------------------------------------------------------------------------------------------------------------------------------------------------------------------------------------------------------|----------------------------------------------------------------------------------------------------------------------------------------------------------------------------------------------|---------------------------------------------------------------------------------------------------------------------------------------------------------------------|
|                       |                                                                                                                                                  | pre-abortion                                                                                                                                                                                              | abortion                                                                                                                                                                                     | post-abortion                                                                                                                                                       |
| Women on Web          | Gomperts et al 2008<br>Gomperts et al 2012<br>Gomperts et al 2014<br>Larrea et al 2015<br>Aiken et al 2016<br>Aiken et al 2017<br>Les et al 2017 | Request online, online assessment by physician, instructions by email.                                                                                                                                    | 200mg mifepristone, 6x200ug Misoprostol, u-HCG test by post, home abortion, 7 d/week online help-desk.                                                                                       | Follow-up questionnaire by email 5 weeks postabortion.                                                                                                              |
| Planned Parenthood    | Grossman et al 2011<br>Grossman et al 2017<br>Grindlay et al 2013<br>Grindlay et al 2016                                                         | TM group: U/S, medical history, informed consent by technician face-to-face, review online and information through skype by physician. Reference group: Face-to-face preabortion assessment by physician. | TM group: Mifepristone intake with physician through skype. Reference group: 200mg mifepristone face-to-face with physician. Both groups: 4 x 200ug Misoprostol take at home 24-48hrs later. | Both groups: in clinic assessment and U/S after 2 weeks, follow-up evaluation questionnaire. Trial of phone follow-up (x3) or email follow-up (x1) in case of LTFU. |
| Willow Womens' Clinic | Wiebe et al 2014                                                                                                                                 | Screening, information and consent by Skype with physician and counselor. S-HCG at local laboratory, if s-HCG>5000, U/S arranged.                                                                         | Medication sent by post or prescription to local pharmacy. S-HCG on day of abortion. Methotraxte 50mg/m2 i.m./p.o, 4x200ug Misoprostol vaginally twice 4-12 hr later taken at home.          | s-HCG after 1 w. Follow-up by skype. If s-HCG decrease ≥80% abortion complete, else s-HCG or in-clinic visit scheduled.                                             |
| Tabbot Foundation     | Hyland et al 2018                                                                                                                                | Tel referral to U/S and s-HCG. Screening, information and consent by tel with physician.                                                                                                                  | Mifepristone 200mg and misoprostol (4x200ug +2x200ug) sent by post. Home abortion with telephone check-up day of ingestion. 24hr on-call telephone availability by physician.                | S-HCG after 7 days, home-pregnancy test after 28 days. Tel follow-up. Follow-up referral if needed.                                                                 |

d=day, U/S=ultrasound, TM=telemedicine, i.m.=intramuscularly, p.o.=per orally, LTFU=lost to follow-up, Tel=telephone, s-HCG=serum human chorionic gonadotropin
