# Supplementary figures and images for: Telemedicine for medical abortion: a systematic review
Source: PubMed Central journal article supplement — BJOG. 2019 Apr 25;126(9):1094–102. doi: 10.1111/1471-0528.15684 (PMC7496179; doi:10.1111/1471-0528.15684), 2019-04-25

## Appendix S1. Search methodology and selection process

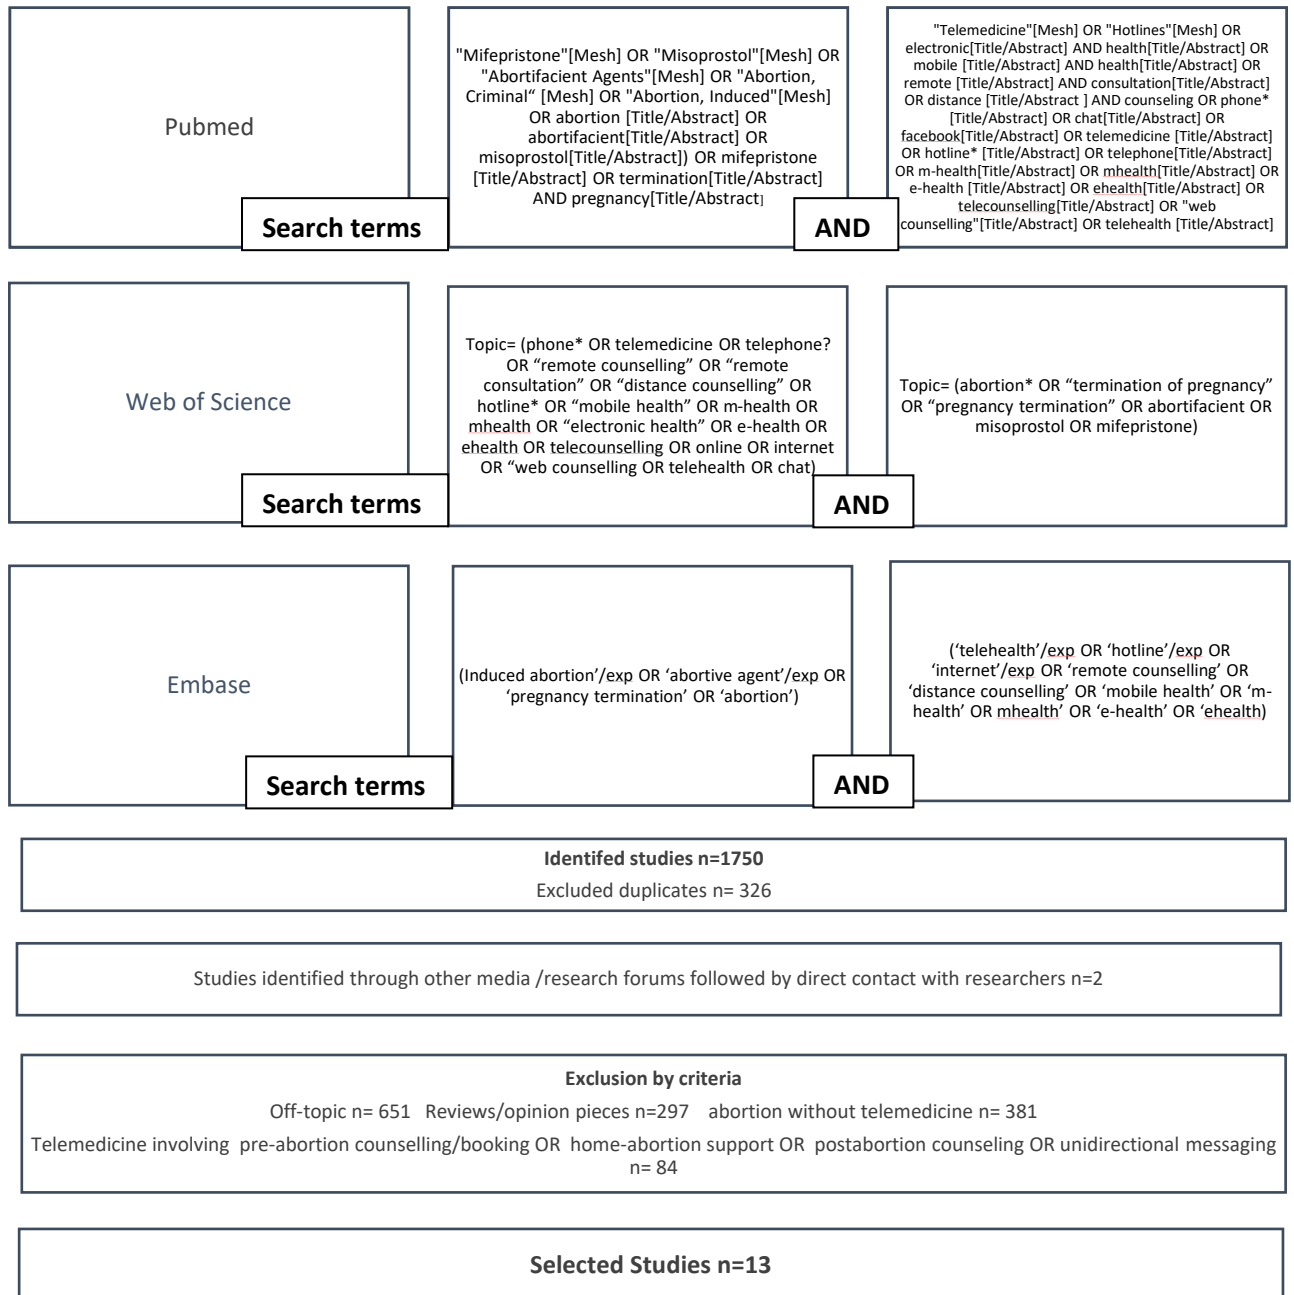

Supplement: BJO-126-1094-s004.pdf [file BJO-126-1094-s004.pdf]
